# Supplementary material
Source: PubMed Central journal article supplement (PMC3375965)
Supplement: supp_pp.112.194647_194647supp.pdf [file supp_pp.112.194647_194647supp.pdf]

## Supplemental Figure S1

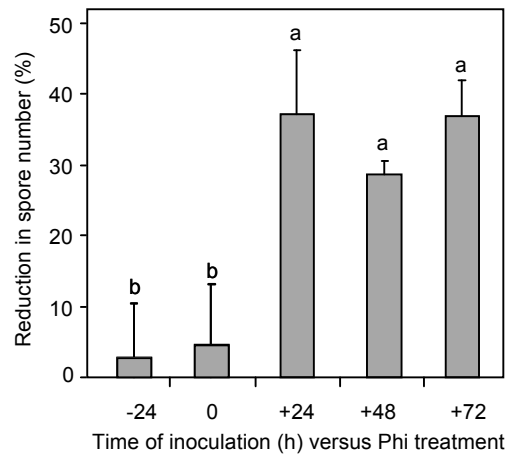

### **Supplemental Figure S1.** Incidence of timing of treatment on Phi effectiveness

Chemical treatment, pathogen inoculation and calculation of Phi effectiveness were performed as described in legend of Figure 3. Plants were inoculated 24 h before treatment (-24 h) or at 0, 24, 48 and 72 h post-treatment. Values are means  $\pm$  SE of 12 replicates from 4 biological independent experiments. Letters indicate significant differences between values (ANOVA, Newman-Keuls test,  $P < 0.05$ ).

## Supplemental Figure S2

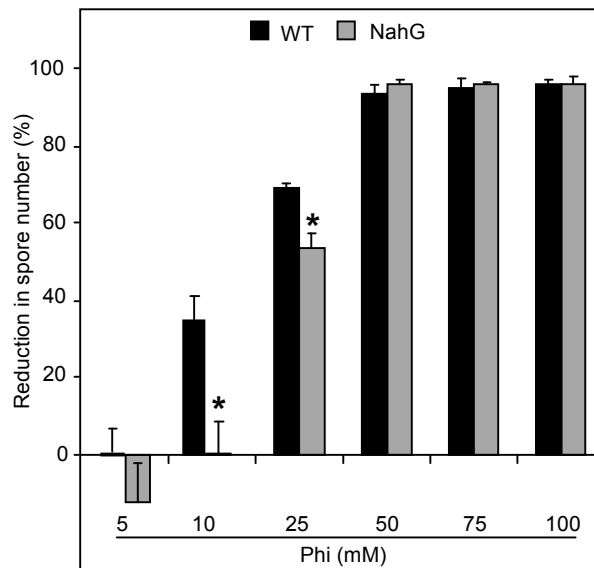

**Supplemental Figure S2.** Phi effectiveness in Col-0 WT and NahG plants against *H. arabidopsidis* Noco2.

Chemical treatment, pathogen inoculation and calculation of Phi effectiveness were performed as described in legend of Figure 2. Values are means  $\pm$  SE of 15 replicates from 5 biological independent experiments. Asterisks indicate data that are significantly different between Col-0 and NahG plants (Mann-Whitney test,  $P < 0.05$ ). Means  $\pm$  SD of spore number quantified in mock-pretreated plants of Col-0 WT and NahG transgenic plants, were  $600 \pm 75$  and  $1700 \pm 110$  spore  $\text{mg}^{-1}$  FW, respectively.

### Supplemental Figure S3

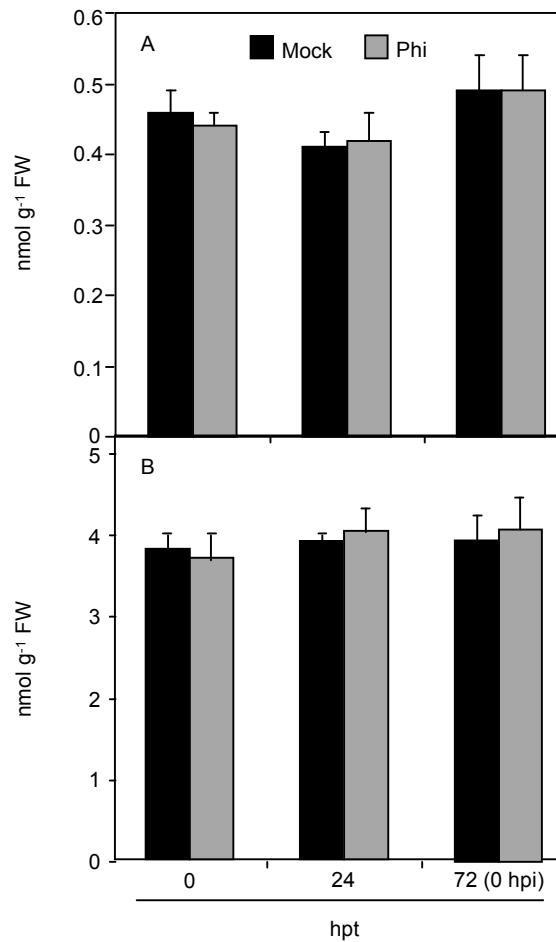

**Supplemental Figure S3.** Effect of Phi treatment on the accumulation of SA in Arabidopsis before inoculation with *H. arabidopsidis*.

Col-0 WT plants were treated as described in legend of Figure 3. A, Accumulation of free SA; B, Accumulation of total SA. Samples were harvested at 0, 24 and 72 h post-treatment (hpt) which correspond to 0 h post-inoculation (hpi). Levels of SA were quantified by HPLC. Values of graphs are means  $\pm$  SD of three replicates. The experiment was repeated twice with similar results.

## Supplemental Figure S4

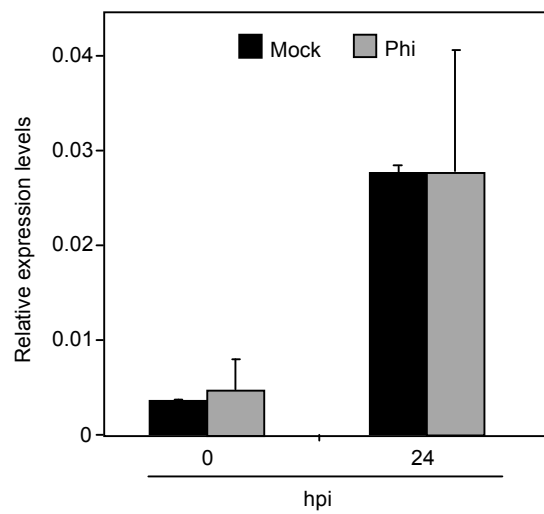

**Supplemental Figure S4** Impact of Phi on *PDF1.2* transcript accumulation in Arabidopsis in response to *H. arabidopsidis* Noco2.

Plants were treated and inoculated as described in legend of Figure 3. Levels of *PDF1.2* transcripts were quantified by qRT-PCR as for *PR1* in legend of Figure 4. Values of graphs are means  $\pm$  SD of three replicates. Experiments were repeated twice with similar results.

## Supplemental Figure S5

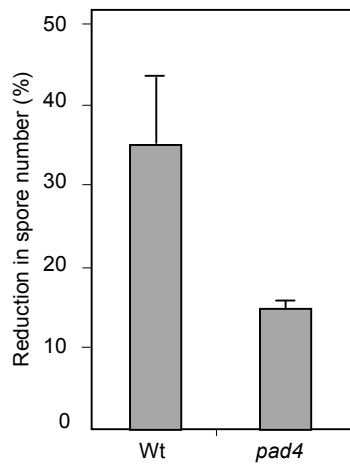

**Supplemental Figure S5.** Phi effectiveness in Col-0 WT and *pad4* mutant against *H. arabidopsidis* Noco2.

Phi treatment, pathogen inoculation and calculation of Phi effectiveness were performed as described in legend of Figure 3. Values are means  $\pm$  SD of three replicates. Experiment was repeated three times with similar results. Phi effectiveness was significantly different between Col-0 and *pad4* mutant (ANOVA, Newman-Keuls test,  $P < 0.05$ ).

## Supplemental Figure S6

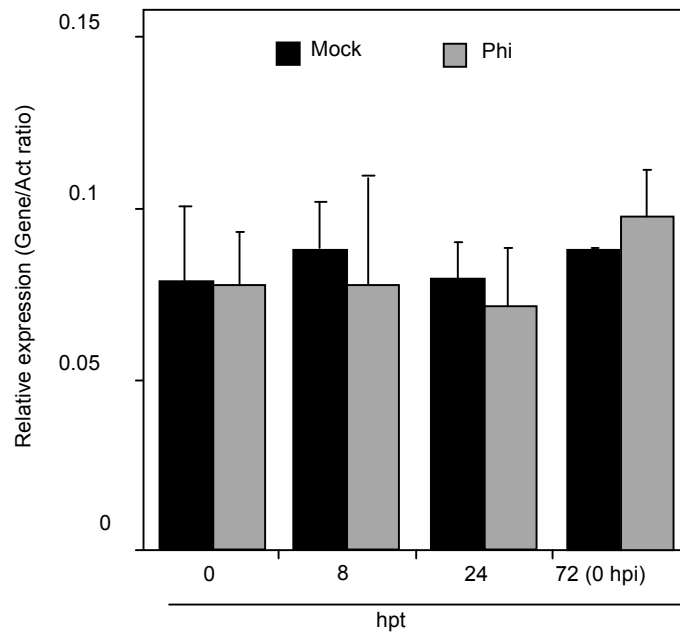

**Supplemental Figure S6.** Impact of Phi on *MPK4* expression in *Arabidopsis* before inoculation with *H. arabidopsidis*.

Plants were treated as described in legend of Figure 3. Samples were harvested at 0, 8, 24 and 72 hour post-treatment (hpt) which correspond to 0 h post-inoculation (hpi). Levels of *MPK4* transcripts were quantified by qRT-PCR as for *PR1* in legend of Figure 4. Values of graphs are means  $\pm$  SE of three replicates. Experiments were repeated twice with similar results.

## Supplemental Figure S7

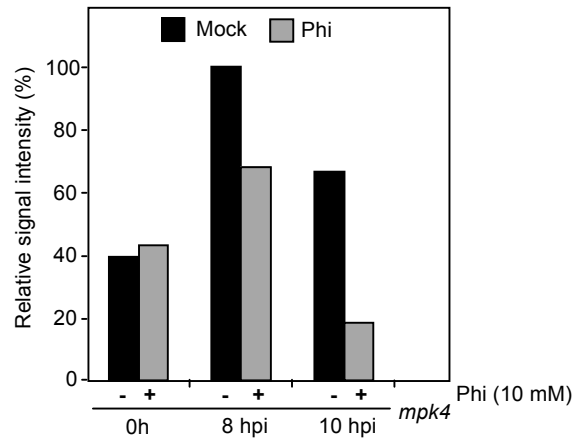

**Supplemental Figure S7.** Quantification of immunodetection signals of MPK4 activity in Figure 7B.

Quantification of signals from immunodetection of protein was done by scanning images and using ImageJ software provided by NIH. Intensity of signals was expressed relative to signal of mock at 8 hpi for MPK4.

## Supplemental Figure S8

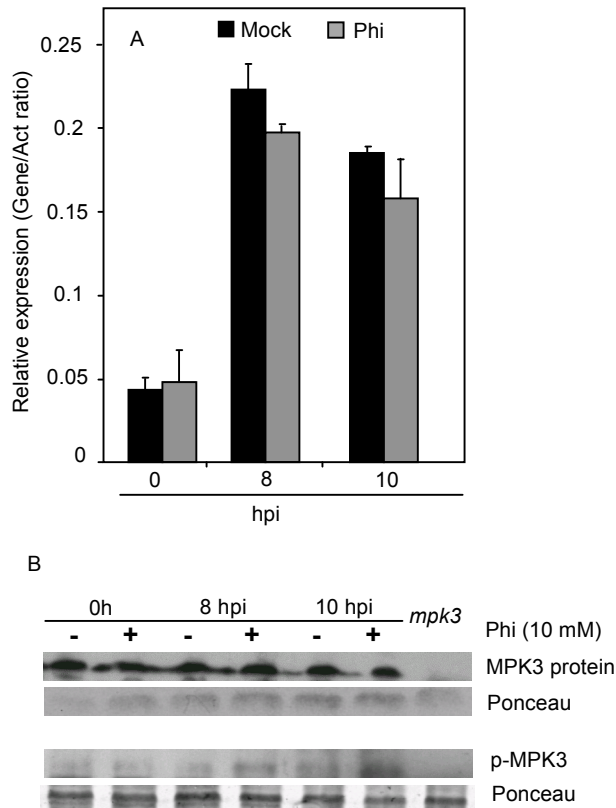

**Supplemental Figure S8.** Effect of Phi treatment on gene expression, protein accumulation and phosphorylation of MPK3 in response to *H. arabidopsis*.

A, *MPK3* expression B, Accumulation and phosphorylation state of MPK3 protein. Plants were treated and inoculated as described in legend of Figure 3. Samples were harvested at 0, 8 and 10 hpi. Aliquots of leaf tissues were used for quantification of *MPK3* transcripts by qRT-PCR as for *PR1* transcripts in legend of Figure 4. Another aliquots of leaf tissues were used for protein extraction and SDS-PAGE. A polyclonal  $\alpha$ -MPK3 antibody was used for the immunodetection of MPK3 protein.  $\alpha$ -phospho-p44/42 ERK antibody was used to monitor the phosphorylation state of MPK3 (p-MPK3). Leaf protein extract of *mpk3* mutant was used as a negative control for MPK3. The experiment was repeated three times with similar results. Ponceau staining shows equal transfer of protein samples to the membrane.



**Table S1.** List of primers used in this work

| Gene          | Arabidopsis Genome Initiative | Primers pairs                                                            | Primer efficiency |
|---------------|-------------------------------|--------------------------------------------------------------------------|-------------------|
| <i>PAD4</i>   | At3g52430                     | F 5'- TCTTAGCCGAGCCACTCGAC -3'<br>R 5'- TTCTCGCCTCATCCAACCAC - 3'        | 97%               |
| <i>EDS1</i>   | At3g48090                     | F 5'- CGAAGACACAGGGCCGTA -3'<br>R 5'- AAGCATGATCCGCACTCG-3'              | 97%               |
| <i>MPK4</i>   | At4g01370                     | F 5'- FCGTTGTGCCACCCATATTT-3'<br>R 5'- AAAATTGAACGGCCTCACAC-3'           | 97%               |
| <i>PR1</i>    | At2g14610                     | F 5'-AGGCTAACTACAACACTACGCTGCG- 3'<br>R 5'-GCTTCTCGTTCACATAATCCCAC-3'    | 95%               |
| <i>PDF1.2</i> | At5g44420                     | F 5'-CTGTTACGTCCCATGTTAAATCTACC-3'<br>R 5'-CAACGGGAAAATAAACATTAAAACAG-3' | 94%               |
| <i>ACT2</i>   | At3g18780                     | F 5'-CTGTACGGTAACATTG TGCTCAG-3'<br>R 5'-CCGATCCAGACACTGTACTIONCC-3'     | 95%               |
